# Supplementary material for: Control of the alkali cation alignment in Prussian blue framework
Source: Royal Society of Chemistry journal article supplement (doi:10.1039/c2dt12296k), 2012-01-01
Supplement: c2dt12296k.pdf [file c2dt12296k.pdf]

## Electronic Supplementary Information.

### Control of the Alkali Cation Alignment in Prussian Blue Framework

Tomoyuki Matsuda, Jungeun Kim, and Yutaka Moritomo\*

#### 1. Rietveld refinement conditions for $\text{Rb}_{0.85}\text{Cu}[\text{Fe}(\text{CN})_6]_{0.95} \cdot 1.3\text{H}_2\text{O}$ :

We indexed the diffraction pattern of  $\text{Rb}_{0.85}\text{Cu}[\text{Fe}(\text{CN})_6]_{0.95} \cdot 1.3\text{H}_2\text{O}$  in an orthorhombic *Pmna* ( $Z = 4$ ) cell. We performed Rietveld analysis, starting with the usual Prussian blue framework, i.e. —Cu—NC—Fe—CN—Cu—NC—Fe— network, and two types of Rb ion in the interstitial sites (Rb1-site and Rb2-site). According to the formula, the occupancy ( $g$ ) for Fe, C, and N atoms are assumed to be 0.95. The O atoms of ligand water molecules coordinated to Cu ions are assumed to occupy the site of N atoms with  $g$  of 0.05. The O atoms of zeolitic water molecules are assumed to occupy the interstitial sites; O7 and O8 occupy at the Rb1-site and Rb-2 site, respectively. The equivalent displacement parameters ( $U$ ) for Fe2, Cu1, and Cu2 is fixed at the value of Fe1, while those for C2–6, N1–6, and O1–8 are fixed at the value of C1.  $U$  for Rb2 is fixed at the value of Rb1. Restraints for the bond length of Fe—C, C—N, and N—Cu, and bond angles of C—Fe—C and Fe—C—N are employed to keep appropriate values. At first,  $g$  values for Rb2, O7 and O8 are assumed to be  $(1.0 - g_{\text{Rb1}})$ ,  $(0.5 - 0.5 \times g_{\text{Rb1}})$ ,  $(0.5 \times g_{\text{Rb1}})$ , respectively, where  $g_{\text{Rb1}}$  is  $g$  of Rb1. However, this constraints makes the  $g$  value for Rb2 negative, and hence,  $g$  values for Rb1, Rb2, O7 and O8 are fixed at the values of 0.85, 0, 0.075, and 0.425.

## 2. Atomic coordinates, occupancy $g$ , and equivalent displacement parameters $U$ of

### **Rb<sub>0.85</sub>Cu[Fe(CN)<sub>6</sub>]<sub>0.95</sub>·1.3H<sub>2</sub>O:**

Table S1. Atomic coordinates, occupancy  $g$ , and equivalent displacement parameters  $U$ . The crystal structure is orthorhombic ( $Pmna$ ,  $Z = 4$ ). The reliability factor the reliability factors are  $R_{wp} = 4.97\%$  and  $R_B = 4.97\%$ . Lattice parameters are  $a = 10.1194(6)$ ,  $b = 10.9598(6)$ ,  $c = 10.0735(7)$  Å, respectively.

| Atom | Site | $g$      | $x$       | $y$       | $Z$       | $U$        |
|------|------|----------|-----------|-----------|-----------|------------|
| Rb1  | 4g   | 0.85     | 1/4       | 0.2366(9) | 1/4       | 0.056(2)   |
| Fe1  | 2b   | 0.95     | 1/2       | 0         | 0         | 0.0221(12) |
| Fe2  | 2d   | 0.95     | 0         | 1/2       | 0         | 0.0221     |
| Cu1  | 2a   | 1        | 0         | 0         | 0         | 0.0221     |
| Cu2  | 2c   | 1        | 1/2       | 1/2       | 0         | 0.0221     |
| C1   | 4h   | 0.95     | 0         | 0.519(14) | 0.19(2)   | 0.020(3)   |
| C2   | 4h   | 0.95     | 0         | 0.319(8)  | 0.047(10) | 0.020      |
| C3   | 4h   | 0.95     | 0         | 0.172(7)  | 0.485(8)  | 0.020      |
| C4   | 4f   | 0.95     | 0         | 0.008(10) | 0.69(2)   | 0.020      |
| C5   | 4e   | 0.95     | 0.31(3)   | 0         | 0         | 0.020      |
| C6   | 4f   | 0.95     | 0.19(3)   | 1/2       | 0         | 0.020      |
| N1   | 4e   | 0.95     | 0         | 0.531(10) | 0.298(12) | 0.020      |
| N2   | 4h   | 0.95     | 0         | 0.214(5)  | 0.048(10) | 0.020      |
| N3   | 4h   | 0.95     | 0         | 0.278(5)  | 0.461(9)  | 0.020      |
| N4   | 4f   | 0.95     | 0         | 0.023(6)  | 0.201(10) | 0.020      |
| N5   | 4h   | 0.95     | 0.20(2)   | 0         | 0         | 0.020      |
| N6   | 4h   | 0.95     | 0.30(2)   | 1/2       | 0         | 0.020      |
| O1   | 4e   | 0.05     | 0         | 0.531     | 0.299     | 0.020      |
| O2   | 4h   | 0.05     | 0         | 0.214     | 0.048     | 0.020      |
| O3   | 4h   | 0.05     | 0         | 0.278     | 0.461     | 0.020      |
| O4   | 4f   | 0.05     | 0         | 0.023     | 0.201     | 0.020      |
| O5   | 4h   | 0.05     | 0.20      | 0         | 0         | 0.020      |
| O6   | 4h   | 0.05     | 0.30      | 1/2       | 0         | 0.020      |
| O7   | 8i   | 0.082(3) | 0.46(2)   | 0.25(5)   | 0.320(14) | 0.020      |
| O8   | 8i   | 0.418    | 0.263(12) | 0.833(2)  | 0.210(5)  | 0.020      |

### 3. The bond lengths of $\text{Rb}_{0.85}\text{Cu}[\text{Fe}(\text{CN})_6]_{0.95} \cdot 1.3\text{H}_2\text{O}$ :

Table S2. The bond lengths (Å) of  $\text{Rb}_{0.85}\text{Cu}[\text{Fe}(\text{CN})_6]_{0.95} \cdot 1.3\text{H}_2\text{O}$ .

|        |         |       |          |
|--------|---------|-------|----------|
| Fe1—C3 | 1.89(8) | C1—N1 | 1.13(14) |
| Fe1—C4 | 1.9(2)  | C2—N2 | 1.15(11) |
| Fe1—C5 | 1.9(3)  | C3—N3 | 1.19(11) |
| Fe2—C1 | 1.9(2)  | C4—N4 | 1.17(14) |
| Fe2—C2 | 2.04(9) | C5—N5 | 1.19(14) |
| Fe2—C6 | 1.9(3)  | C6—N6 | 1.18(13) |

#### 4. Crystal structure of $\text{Rb}_{0.85}\text{Cu}[\text{Fe}(\text{CN})_6]_{0.95} \cdot 1.3\text{H}_2\text{O}$ :

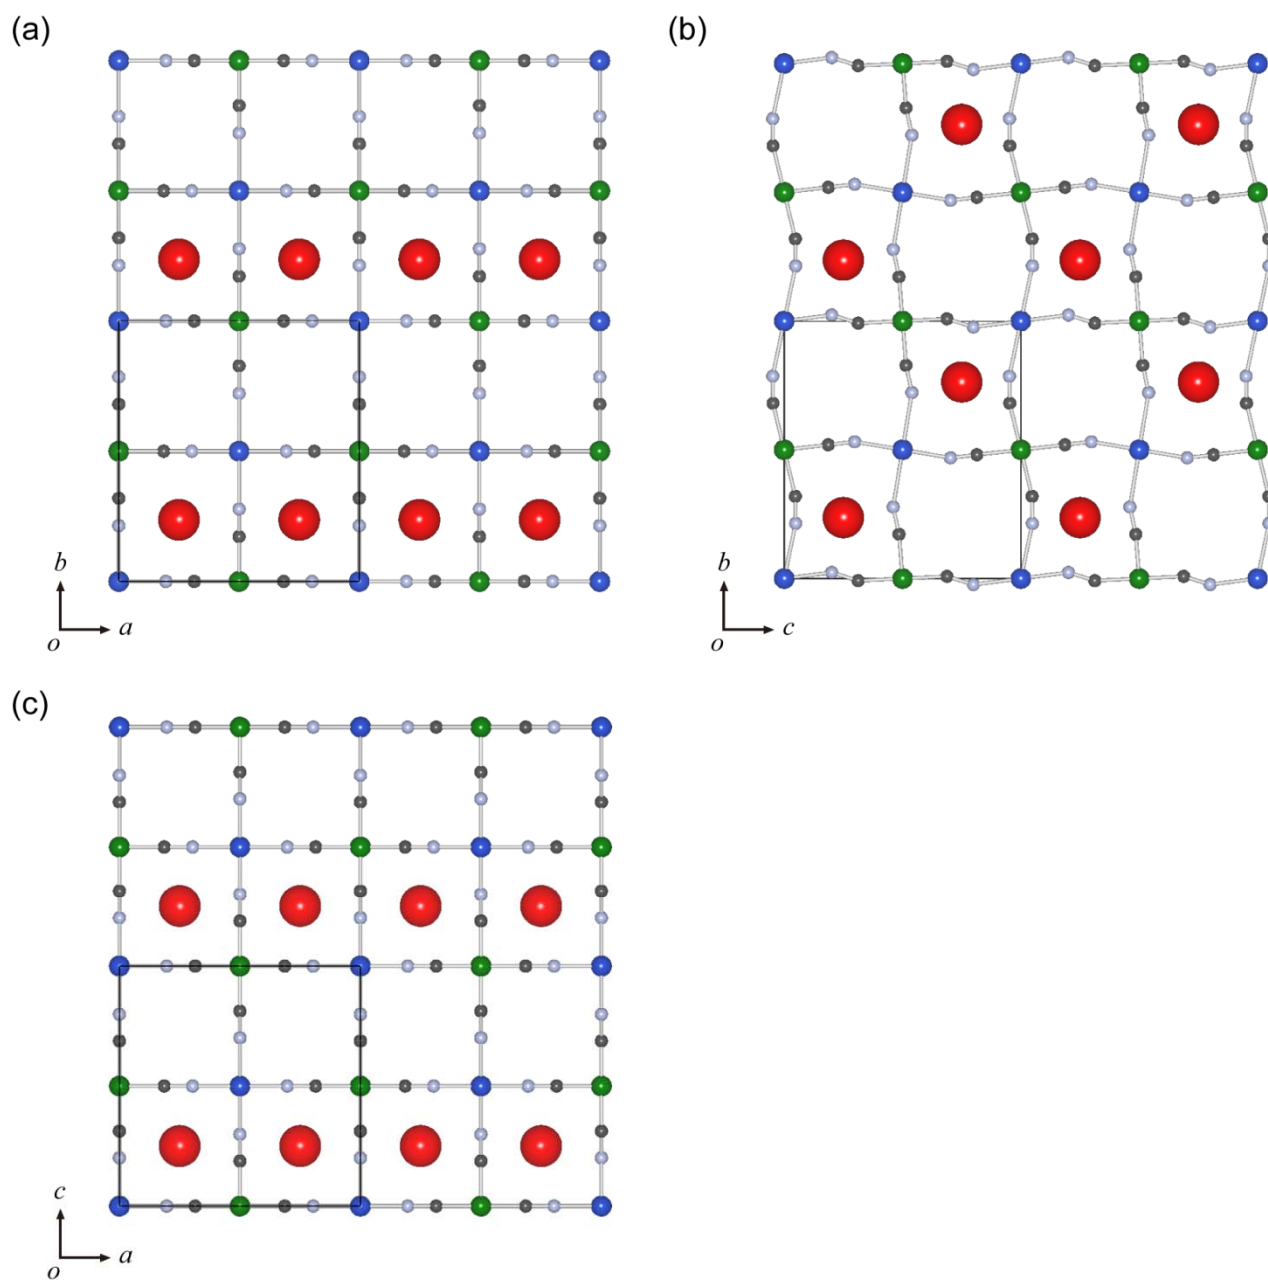

Figure S1. The crystal structure of  $\text{Rb}_{0.85}\text{Cu}[\text{Fe}(\text{CN})_6]_{0.95} \cdot 1.3\text{H}_2\text{O}$ . (a) The projection in the  $ab$  plane. (b) The projection in the  $bc$  plane. (c) The projection in the  $ac$  plane.

### 5. Rietveld refinement condition of $\text{Cs}_{0.97}\text{Cu}[\text{Fe}(\text{CN})_6]_{0.99} \cdot 1.1\text{H}_2\text{O}$ :

We performed Rietveld analysis based on the usual tetragonal Prussian blue framework. According to the formula, the occupancy ( $g$ ) for Fe, C, and N atoms are assumed to be 0.99. The O atoms of ligand water molecules coordinated to Cu ion are assumed to occupy the sites of N atoms with  $g$  of 0.01.  $g$  for Cs2 is assumed to be  $(0.97 - g_{\text{Cs1}})$ , where  $g_{\text{Cs1}}$  is  $g$  of Cs1. The O atoms of zeolitic water molecules are assumed to occupy  $4f$  ( $0\ 1/2\ z$ ) position; O3, and O4 occupies at Cs1-site and Cs2-site, respectively.  $g$  for O4 is assumed to be  $(0.26 - g_{\text{O3}})$ , where  $g_{\text{O3}}$  is  $g$  of O3. The equivalent displacement parameters ( $U$ ) for Cu1 is fixed at the value of Fe1, while those for C2, N1–2, and O1–4 are fixed at the value of C1.  $U$  for Cs2 is fixed at the value of Cs1. Restraints for the bond length of Fe—C, C—N, and Cu—N are employed to keep appropriate values.

## 6. Atomic coordinates, occupancy $g$ , and equivalent displacement parameters $U$ of

### $\text{Cs}_{0.97}\text{Cu}[\text{Fe}(\text{CN})_6]_{0.99} \cdot 1.1\text{H}_2\text{O}$ :

Table S3. Atomic coordinates, occupancy  $g$ , and equivalent displacement parameters  $U$ . The crystal structure is tetragonal ( $I\bar{4}m2$ ,  $Z = 2$ ). The reliability factors are  $R_{\text{wp}} = 6.74\%$  and  $R_{\text{B}} = 2.95\%$ . Lattice parameters are  $a = 7.1702(2)$ ,  $c = 10.9843(5)$  Å, respectively.

| Atom | Site | $g$      | $x$        | $Y$    | $z$        | $U$        |
|------|------|----------|------------|--------|------------|------------|
| Cs1  | 2d   | 0.619(6) | 1/2        | 0      | 1/4        | 0.0440(14) |
| Cs2  | 2c   | 0.351    | 1/2        | 0      | 3/4        | 0.0440     |
| Fe1  | 2a   | 0.99     | 0          | 0      | 0          | 0.0148(10) |
| Cu1  | 2b   | 1        | 1/2        | 1/2    | 0          | 0.0148     |
| C1   | 4e   | 0.99     | 0          | 0      | 0.1729(19) | 0.014(2)   |
| C2   | 8g   | 0.99     | 0.180(2)   | 0.180  | 0          | 0.014(2)   |
| N1   | 4e   | 0.99     | 0          | 0      | 0.2777(17) | 0.014(2)   |
| N2   | 8g   | 0.99     | 0.2990(18) | 0.2990 | 0          | 0.014(2)   |
| O1   | 4e   | 0.01     | 0          | 0      | 0.2777     | 0.014(2)   |
| O2   | 8g   | 0.01     | 0.2990     | 0.2990 | 0          | 0.014(2)   |
| O3   | 4f   | 0.12(2)  | 1/2        | 0      | 0.365(10)  | 0.014(2)   |
| O4   | 4f   | 0.14     | 1/2        | 0      | 0.697(8)   | 0.014(2)   |

### 7. The bond lengths of $\text{Cs}_{0.97}\text{Cu}[\text{Fe}(\text{CN})_6]_{0.99} \cdot 1.1\text{H}_2\text{O}$ :

Table S4. The bond lengths (Å) of  $\text{Cs}_{0.97}\text{Cu}[\text{Fe}(\text{CN})_6]_{0.99} \cdot 1.1\text{H}_2\text{O}$ .

|        |         |       |         |
|--------|---------|-------|---------|
| Fe1—C1 | 1.83(2) | C1—N1 | 1.15(2) |
| Fe1—C2 | 1.90(2) | C2—N2 | 1.20(1) |
